# Supplementary material
Source: Springer Nature journal article supplement (https://www.springermedizin.de/resource/supplementary/12881_2009_609_MOESM11_ESM.pdf/9451060)

# Family 8 (237)

I

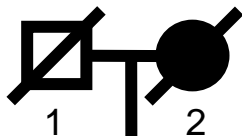

II

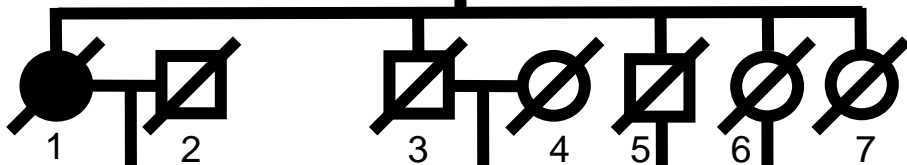

III

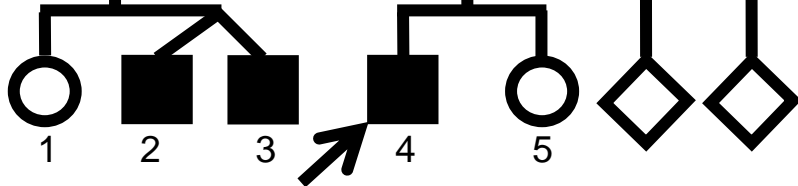

Supplement: MOESM11 [file 9451060]
